# Supplementary material for: Community Pharmacist-Administered COVID-19 Vaccinations: A Pilot Customer Survey on Satisfaction and Motivation to Get Vaccinated
Source: MDPI journal article supplement (doi:10.3390/vaccines9111320), 2021-11-14
Supplement: s1 [file s1]

# Community Pharmacist-Administered COVID-19 Vaccinations: a Pilot Customer Survey on Satisfaction and Motivation to Get Vaccinated

## Supplementary Materials

**Figure S1.** Original survey questionnaire in German language. Translated questionnaire items (not validated): 3. I am comfortable with the COVID vaccination being done in a pharmacy. 4. I am satisfied with the injection technique at the pharmacy. 5. I am satisfied with the pre-liminary discussion of the COVID vaccination. 6. I think pharmacies are well informed about COVID vaccines. 7. I am satisfied with the premises used for COVID vaccination. 8. I would recommend COVID vaccination at the pharmacy. 9. I am satisfied with the COVID vaccine that was available. 10. I am satisfied with the way the appointment was made. 11. Is there anything you would change about the current service? 12. What do you think has already worked well?; 13. I want to reduce my own risk of contracting the coronavirus. 14. My job puts me at higher risk of contracting the coronavirus. 15. I want to protect others from being infected with the coronavirus through me. 16. I work with people who need to be protected from coronavirus infection (e.g., the elderly, the sick, nursing home residents). 17. I would like to be less restricted in everyday life. 18. I would like to be able to travel again soon. 19. I would like to follow the recommendations of the FOPH (Federal Office of Public Health). 20. I would be willing to have an annual booster vaccination (if needed). 21. I would be willing to come to the pharmacy for an annual booster vaccination (if needed). 22. I did an antibody test before deciding to vaccinate. 23. If possible, I would welcome being able to confirm the effect of the vaccination with an antibody test.; 24. Because the pharmacy was the only vaccination centre available to me. 25. Because the opening hours of the pharmacy suit me. 26. Because the pharmacy is easily accessible for me (e.g., parking, public transport connection). 27. Because I have already had good experiences with vaccinations at the pharmacy. 28. Because I don't have a general practitioner. 29. Because my physician is not available. 30. Because I trust the pharmacy. 31. Would you have had the COVID vaccination done elsewhere, e.g., by a physician, in a vaccination centre? 32. How often have you had vaccinations (including other vaccinations) at a pharmacy? 33. What is your salutation?; 34. How old are you? 35. In which zip code was the COVID vaccination carried out? 36. What is your highest acquired level of education? 37. Do you belong to a specific target risk group for COVID vaccination? 38. What vaccine did you receive today? 39. How would you describe your general vaccination coverage? 40. How often have you been vaccinated against seasonal flu (influenza) in the past few years?

## Kundenzufriedenheit COVID-Impfung Apotheken Zürich

Page 1

### Informationen für Teilnehmende

Vielen Dank, dass Sie sich für eine Teilnahme an unserer Studie entschieden haben. Die Auswertung Ihrer Antworten wird uns helfen, die COVID-Impfung als Dienstleistung weiter zu verbessern.

Bevor wir mit der eigentlichen Umfrage beginnen können, müssen Sie bestätigen, dass Sie die Informationen auf der Rückseite des Einladungsschreibens gelesen und verstanden haben. Dazu finden Sie unten an dieser Seite eine Bestätigungsfrage. Auch können Sie sich hier einen Nicknamen geben, den Sie uns bei einem späteren Widerruf Ihrer Einwilligung angeben können.

Bei Fragen zu dieser Studie wenden Sie sich bitte an die angegebene Kontaktperson. Die impfenden Apotheken haben aktuell keine Kapazität, Sie beim Ausfüllen dieses Fragebogens zu unterstützen.

#### Kontaktperson

ETH Zürich

Dr. phil. Dominik Stämpfli

eidg. dipl. pharm., FPH Klinische Pharmazie

Wissenschaftlicher Mitarbeiter Pharmakoepidemiologie

Institut für Pharmazeutische Wissenschaften

Vladimir-Prelog-Weg 4

8093 Zürich

dominik.staempfli@pharma.ethz.ch

#### 1. Mit meinem Einverständnis zur Datenerhebung bestätige ich als teilnehmende Person:

- Ich habe die Informationen zur Studie auf der Rückseite der Einladung gelesen und verstanden.
- Ich erfülle die im Informationsteil genannten Bedingungen für die Teilnahme und bin mir bewusst, dass die genannten Anforderungen und Einschränkungen einzuhalten sind.
- Ich hatte genügend Zeit, über meine Teilnahme zu entscheiden.
- Ich nehme an der Studie freiwillig teil und bin einverstanden, dass meine Daten wie oben beschrieben verarbeitet werden.

\*

Sind Sie mit dieser Datenerhebung einverstanden?

☐ Ja

☐ Nein

#### 2. Sie können Ihr Einverständnis zur Bearbeitung Ihrer Daten jederzeit ohne Angabe von Gründen widerrufen. Geben Sie sich dazu bitte einen Nicknamen, den Sie uns bei Widerruf Ihres Einverständnis nennen könnten.

Die Angabe eines Nicknamens ist freiwillig.

**Kundenzufriedenheit COVID-Impfung Apotheken Zürich****Page 2****Zufriedenheit**

Zu Beginn möchten wir Ihre Zufriedenheit mit der Dienstleistung erfahren. Bitte bewerten Sie, wie sehr folgende Aussagen auf Sie zutreffen. Falls Sie eine Frage nicht beantworten können - beispielsweise weil sie nicht auf Ihre konkrete Situation zutrifft - können Sie "nicht beantwortbar" auswählen.

3. Ich fühle mich wohl damit, dass die COVID-Impfung in einer Apotheke durchgeführt wird.

\*

trifft eher zu

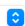

4. Ich bin zufrieden mit der Injektionstechnik in der Apotheke.

\*

trifft eher zu

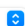

5. Ich bin zufrieden mit der Vorbesprechung der COVID-Impfung.

\*

trifft eher zu



6. Ich denke, dass die Apotheken über die COVID-Impfstoffe gut informiert sind.

\*

trifft eher zu



7. Ich bin zufrieden mit den Räumlichkeiten, welche für die COVID-Impfung verwendet werden.

\*

trifft eher zu

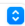

8. Ich würde die COVID-Impfung in der Apotheke weiterempfehlen.

\*

trifft eher zu



9. Ich bin zufrieden mit dem COVID-Impfstoff, der zur Verfügung stand.

\*

trifft eher zu

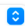

10. Ich bin zufrieden wie die Terminvereinbarung stattgefunden hat.

\*

trifft eher zu



11. Gibt es etwas, das Sie an der aktuellen Dienstleistung verändern würden?

12. Was hat Ihrer Meinung nach bereits gut funktioniert?

**Kundenzufriedenheit COVID-Impfung Apotheken Zürich****Page 3****Motivation**

Im Folgenden möchten wir Ihre Gründe für die COVID-Impfung erfahren. Bitte bewerten Sie, wie sehr folgende Aussagen auf Sie zutreffen. Falls Sie eine Frage nicht beantworten können - beispielsweise weil sie nicht auf Ihre konkrete Situation zutrifft - können Sie "nicht beantwortbar" auswählen.

13. Ich möchte mein eigenes Risiko reduzieren, mich mit dem Coronavirus anzustecken.

\*

14. Mein Beruf setzt mich einem höheren Risiko aus, mich mit dem Coronavirus anzustecken.

\*

15. Ich möchte andere Personen davor schützen, durch mich mit dem Coronavirus angesteckt zu werden.

\*

16. Ich arbeite mit Personen, welche vor einer Coronavirus-Infektion geschützt werden müssen (z. B. Betagte, Kranke, Heimbewohner).

\*

17. Ich möchte im Alltag weniger eingeschränkt sein.

\*

18. Ich möchte bald wieder verreisen können.

\*

19. Ich möchte den Empfehlungen des BAG (Bundesamt für Gesundheit) folgen.

\*

20. Ich wäre bereit, eine jährliche Auffrischimpfung (falls diese nötig sein sollte) zu machen.

\*

21. Ich wäre bereit, eine jährliche Auffrischimpfung (falls diese nötig sein sollte) in der Apotheke machen zu kommen.

\*

22. Ich habe vor der Impfentscheidung einen Antikörpertest gemacht.\*

23. Falls möglich, würde ich es begrüßen, die Wirkung der Impfung mit einem Antikörpertest bestätigen zu können.

\*

**Kundenzufriedenheit COVID-Impfung Apotheken Zürich****Page 4****Gründe für die Wahl einer Apotheke**

Im Folgenden möchten wir Ihre Gründe für die Wahl einer Apotheke als Impfort erfahren. Bitte bewerten Sie, wie sehr folgende Aussagen auf Sie zutreffen. Falls Sie eine Frage nicht beantworten können - beispielsweise weil sie nicht auf Ihre konkrete Situation zutrifft - können Sie "nicht beantwortbar" auswählen.

24. Weil mir die Apotheke als einziger Impfort zur Verfügung stand.

\*

 

25. Weil mir die Öffnungszeiten der Apotheke entsprechen.

\*

 

26. Weil die Apotheke für mich leicht zugänglich ist (z. B. Parkplatz, Anbindung öffentlicher Verkehr).

\*

 

27. Weil ich bezüglich Impfungen in der Apotheke bereits gute Erfahrungen gemacht habe.

\*

 

28. Weil ich keine Hausärztin/keinen Hausarzt habe.

\*

 

29. Weil meine Ärztin/mein Arzt nicht verfügbar ist.

\*

 

30. Weil ich der Apotheke vertraue.

\*

 

31. Hätten Sie die COVID-Impfung auch anderswo durchführen lassen, z.B. bei einer Ärztin / einem Arzt, in einem Impfzentrum?

\*

- ☒ Ja  
☐ Nein  
☐ Ich weiss es nicht

32. Wie oft haben Sie sich bereits in einer Apotheke impfen lassen (auch andere Impfungen)?

\*

- ☒ Dieses war das erste Mal  
☐ 1-2  
☐ 3-4  
☐ >4

**Kundenzufriedenheit COVID-Impfung Apotheken Zürich****Page 5****Allgemeine Informationen**

Zum Abschluss möchten wir allgemeine Informationen erfahren. Diese helfen uns bei der Auswertung, um Zusammenhänge aufzuzeigen.

33. Wie lautet Ihre Anrede?

\*

34. Wie alt sind Sie?

\* The value must be between 1 and 110, inclusive.

35. In welcher Postleitzahl (PLZ) wurde die COVID-Impfung durchgeführt?

\*

36. Was ist Ihr höchster erworbener Ausbildungsgrad?

37. Gehören Sie zu einer bestimmten Ziel-Risikogruppe für die COVID-Impfung?\*

Wählen Sie bitte entsprechend aus.

38. Welchen Impfstoff haben Sie heute erhalten?\*

39. Wir würden Sie Ihren allgemeinen Durchimpfungsgrad bezeichnen?

\*

40. Wie oft haben Sie sich in den vergangenen Jahren bereits gegen die saisonale Grippe (Influenza) impfen lassen?

\*

- ☒ 0
- ☐ 1-2
- ☐ 3-4
- ☐ >4

**Table S1.** Results of the Likert scale questionnaire items of individuals with complete demographic information (N = 372).

|                                                     | <b>Does not<br/>apply at all</b> | <b>Does not<br/>apply</b> | <b>Rather does<br/>not apply</b> |  | <b>Rather does<br/>apply</b> | <b>Does<br/>apply</b> | <b>Does fully<br/>apply</b> |
|-----------------------------------------------------|----------------------------------|---------------------------|----------------------------------|--|------------------------------|-----------------------|-----------------------------|
| <b>Choice of a pharmacy as place of vaccination</b> |                                  |                           |                                  |  |                              |                       |                             |
| Only place                                          | 52                               | 131                       | 26                               |  | 76                           | 50                    | 30                          |
| Opening hours                                       | 22                               | 61                        | 35                               |  | 118                          | 75                    | 44                          |
| Accessibility                                       | 10                               | 24                        | 19                               |  | 79                           | 91                    | 146                         |
| Positive experiences                                | 25                               | 114                       | 22                               |  | 55                           | 29                    | 37                          |
| No primary care physician                           | 76                               | 177                       | 21                               |  | 47                           | 32                    | 15                          |
| Availability of physician                           | 51                               | 143                       | 22                               |  | 63                           | 40                    | 12                          |
| Trust                                               | 3                                | 7                         | 4                                |  | 130                          | 111                   | 97                          |
| <b>Satisfaction</b>                                 |                                  |                           |                                  |  |                              |                       |                             |
| Preptalk                                            | 2                                | 1                         | 1                                |  | 40                           | 89                    | 238                         |
| Feeling comfortable                                 | 0                                | 0                         | 2                                |  | 19                           | 70                    | 281                         |
| Injection technique                                 | 1                                | 1                         | 1                                |  | 21                           | 46                    | 302                         |
| Knowledge                                           | 2                                | 0                         | 2                                |  | 29                           | 100                   | 234                         |
| Facility                                            | 2                                | 1                         | 4                                |  | 53                           | 99                    | 213                         |
| Recommendation                                      | 2                                | 0                         | 3                                |  | 30                           | 70                    | 267                         |
| Vaccine                                             | 0                                | 3                         | 0                                |  | 54                           | 105                   | 196                         |
| Scheduling                                          | 5                                | 14                        | 15                               |  | 74                           | 70                    | 194                         |
| <b>Motivation</b>                                   |                                  |                           |                                  |  |                              |                       |                             |
| Own risk                                            | 1                                | 8                         | 15                               |  | 70                           | 89                    | 188                         |
| Job increases own risk                              | 44                               | 92                        | 65                               |  | 67                           | 60                    | 41                          |
| Others' risk                                        | 1                                | 1                         | 7                                |  | 69                           | 81                    | 213                         |
| Job increases risk for others                       | 103                              | 125                       | 39                               |  | 60                           | 23                    | 18                          |
| Restrictions                                        | 0                                | 4                         | 6                                |  | 73                           | 88                    | 201                         |
| Travel                                              | 5                                | 5                         | 15                               |  | 77                           | 85                    | 185                         |
| Official recommendation                             | 6                                | 8                         | 22                               |  | 130                          | 127                   | 75                          |
| Antibody test post                                  | 6                                | 36                        | 63                               |  | 123                          | 95                    | 43                          |
| <b>Booster vaccination</b>                          |                                  |                           |                                  |  |                              |                       |                             |
| Yearly booster                                      | 4                                | 11                        | 32                               |  | 106                          | 110                   | 107                         |
| Booster in pharmacy                                 | 0                                | 2                         | 13                               |  | 102                          | 67                    | 185                         |

**Table S2.** Results of the Likert scale questionnaire items in percent from individuals with complete demographic information (N = 372).

|                                              | Does not<br>apply at all | Does not<br>apply | Rather does<br>not apply |  | Rather does<br>apply | Does<br>apply | Does fully<br>apply |
|----------------------------------------------|--------------------------|-------------------|--------------------------|--|----------------------|---------------|---------------------|
| Choice of a pharmacy as place of vaccination |                          |                   |                          |  |                      |               |                     |
| Only place                                   | 14.25%                   | 35.89%            | 7.12%                    |  | 20.82%               | 13.70%        | 8.22%               |
| Opening hours                                | 6.20%                    | 17.18%            | 9.86%                    |  | 33.24%               | 21.13%        | 12.39%              |
| Accessibility                                | 2.71%                    | 6.50%             | 5.15%                    |  | 21.41%               | 24.66%        | 39.57%              |
| Positive experiences                         | 8.87%                    | 40.43%            | 7.80%                    |  | 19.50%               | 10.28%        | 13.12%              |
| No primary care physician                    | 20.65%                   | 48.10%            | 5.71%                    |  | 12.77%               | 8.70%         | 4.08%               |
| Availability of physician                    | 15.41%                   | 43.20%            | 6.65%                    |  | 19.03%               | 12.08%        | 3.63%               |
| Trust                                        | 0.85%                    | 1.99%             | 1.14%                    |  | 36.93%               | 31.53%        | 27.56%              |
| Satisfaction                                 |                          |                   |                          |  |                      |               |                     |
| Preptalk                                     | 0.54%                    | 0.27%             | 0.27%                    |  | 10.78%               | 23.99%        | 64.15%              |
| Feeling comfortable                          | 0.00%                    | 0.00%             | 0.54%                    |  | 5.11%                | 18.82%        | 75.54%              |
| Injection technique                          | 0.27%                    | 0.27%             | 0.27%                    |  | 5.65%                | 12.37%        | 81.18%              |
| Knowledge                                    | 0.54%                    | 0.00%             | 0.54%                    |  | 7.90%                | 27.25%        | 63.76%              |
| Facility                                     | 0.54%                    | 0.27%             | 1.08%                    |  | 14.25%               | 26.61%        | 57.26%              |
| Recommendation                               | 0.54%                    | 0.00%             | 0.81%                    |  | 8.06%                | 18.82%        | 71.77%              |
| Vaccine                                      | 0.00%                    | 0.84%             | 0.00%                    |  | 15.08%               | 29.33%        | 54.75%              |
| Scheduling                                   | 1.34%                    | 3.76%             | 4.03%                    |  | 19.89%               | 18.82%        | 52.15%              |
| Motivation                                   |                          |                   |                          |  |                      |               |                     |
| Own risk                                     | 0.27%                    | 2.16%             | 4.04%                    |  | 18.87%               | 23.99%        | 50.67%              |
| Job increases own risk                       | 11.92%                   | 24.93%            | 17.62%                   |  | 18.16%               | 16.26%        | 11.11%              |
| Others' risk                                 | 0.27%                    | 0.27%             | 1.88%                    |  | 18.55%               | 21.77%        | 57.26%              |
| Job increases risk for others                | 27.99%                   | 33.97%            | 10.60%                   |  | 16.30%               | 6.25%         | 4.89%               |
| Restrictions                                 | 0.00%                    | 1.08%             | 1.61%                    |  | 19.62%               | 23.66%        | 54.03%              |
| Travel                                       | 1.34%                    | 1.34%             | 4.03%                    |  | 20.70%               | 22.85%        | 49.73%              |
| Official recommendation                      | 1.63%                    | 2.17%             | 5.98%                    |  | 35.33%               | 34.51%        | 20.38%              |
| Antibody test post                           | 1.64%                    | 9.84%             | 17.21%                   |  | 33.61%               | 25.96%        | 11.75%              |
| Booster vaccination                          |                          |                   |                          |  |                      |               |                     |
| Yearly booster                               | 1.08%                    | 2.97%             | 8.65%                    |  | 28.65%               | 29.73%        | 28.92%              |
| Booster in pharmacy                          | 0.00%                    | 0.54%             | 3.52%                    |  | 27.64%               | 18.16%        | 50.14%              |



**Table S3.** Results of the Likert scale questionnaire items of all filled questionnaires (N = 421), including 49 questionnaires with missing demographic information, as sensitivity analysis.

|                                              | Does not<br>apply at all | Does not<br>apply | Rather does<br>not apply |  | Rather does<br>apply | Does<br>apply | Does fully<br>apply |
|----------------------------------------------|--------------------------|-------------------|--------------------------|--|----------------------|---------------|---------------------|
| Choice of a pharmacy as place of vaccination |                          |                   |                          |  |                      |               |                     |
| Only place                                   | 52                       | 133               | 26                       |  | 80                   | 52            | 30                  |
| Opening hours                                | 22                       | 62                | 36                       |  | 123                  | 76            | 44                  |
| Accessibility                                | 10                       | 25                | 19                       |  | 84                   | 93            | 146                 |
| Positive experiences                         | 27                       | 114               | 22                       |  | 61                   | 29            | 37                  |
| No primary care physician                    | 78                       | 178               | 22                       |  | 51                   | 32            | 15                  |
| Availability of physician                    | 52                       | 144               | 22                       |  | 68                   | 41            | 12                  |
| Trust                                        | 3                        | 7                 | 4                        |  | 135                  | 113           | 98                  |
| Satisfaction                                 |                          |                   |                          |  |                      |               |                     |
| Preptalk                                     | 2                        | 1                 | 1                        |  | 49                   | 98            | 255                 |
| Feeling comfortable                          | 0                        | 0                 | 2                        |  | 25                   | 81            | 299                 |
| Injection technique                          | 1                        | 1                 | 1                        |  | 30                   | 52            | 322                 |
| Knowledge                                    | 2                        | 0                 | 2                        |  | 38                   | 109           | 251                 |
| Facility                                     | 2                        | 1                 | 4                        |  | 60                   | 111           | 229                 |
| Recommendation                               | 2                        | 0                 | 3                        |  | 38                   | 78            | 286                 |
| Vaccine                                      | 0                        | 3                 | 0                        |  | 67                   | 114           | 209                 |
| Scheduling                                   | 5                        | 14                | 18                       |  | 87                   | 76            | 207                 |
| Motivation                                   |                          |                   |                          |  |                      |               |                     |
| Own risk                                     | 2                        | 8                 | 16                       |  | 78                   | 92            | 193                 |
| Job increases own risk                       | 44                       | 95                | 66                       |  | 77                   | 63            | 41                  |
| Others' risk                                 | 1                        | 1                 | 7                        |  | 77                   | 86            | 218                 |
| Job increases risk for others                | 106                      | 125               | 41                       |  | 72                   | 23            | 19                  |
| Restrictions                                 | 0                        | 4                 | 6                        |  | 85                   | 90            | 205                 |
| Travel                                       | 5                        | 5                 | 15                       |  | 86                   | 88            | 191                 |
| Official recommendation                      | 6                        | 9                 | 22                       |  | 143                  | 129           | 77                  |
| Antibody test post                           | 7                        | 36                | 65                       |  | 134                  | 95            | 46                  |
| Booster vaccination                          |                          |                   |                          |  |                      |               |                     |
| Yearly booster                               | 4                        | 11                | 32                       |  | 116                  | 114           | 110                 |
| Booster in pharmacy                          | 0                        | 2                 | 13                       |  | 113                  | 69            | 190                 |

**Table S4.** Results of the Likert scale questionnaire items of all filled questionnaires (N = 421) in percent, including 49 questionnaires with missing demographic information, as sensitivity analysis.

|                                                     | <b>Does not<br/>apply at all</b> | <b>Does not<br/>apply</b> | <b>Rather does<br/>not apply</b> |  | <b>Rather does<br/>apply</b> | <b>Does<br/>apply</b> | <b>Does fully<br/>apply</b> |
|-----------------------------------------------------|----------------------------------|---------------------------|----------------------------------|--|------------------------------|-----------------------|-----------------------------|
| <b>Choice of a pharmacy as place of vaccination</b> |                                  |                           |                                  |  |                              |                       |                             |
| Only place                                          | 13.94%                           | 35.66%                    | 6.97%                            |  | 21.45%                       | 13.94%                | 8.04%                       |
| Opening hours                                       | 6.06%                            | 17.08%                    | 9.92%                            |  | 33.88%                       | 20.94%                | 12.12%                      |
| Accessibility                                       | 2.65%                            | 6.63%                     | 5.04%                            |  | 22.28%                       | 24.67%                | 38.73%                      |
| Positive experiences                                | 9.31%                            | 39.31%                    | 7.59%                            |  | 21.03%                       | 10.00%                | 12.76%                      |
| No primary care physician                           | 20.74%                           | 47.34%                    | 5.85%                            |  | 13.56%                       | 8.51%                 | 3.99%                       |
| Availability of physician                           | 15.34%                           | 42.48%                    | 6.49%                            |  | 20.06%                       | 12.09%                | 3.54%                       |
| Trust                                               | 0.83%                            | 1.94%                     | 1.11%                            |  | 37.50%                       | 31.39%                | 27.22%                      |
| <b>Satisfaction</b>                                 |                                  |                           |                                  |  |                              |                       |                             |
| Preptalk                                            | 0.49%                            | 0.25%                     | 0.25%                            |  | 12.07%                       | 24.14%                | 62.81%                      |
| Feeling comfortable                                 | 0.00%                            | 0.00%                     | 0.49%                            |  | 6.14%                        | 19.90%                | 73.46%                      |
| Injection technique                                 | 0.25%                            | 0.25%                     | 0.25%                            |  | 7.37%                        | 12.78%                | 79.12%                      |
| Knowledge                                           | 0.50%                            | 0.00%                     | 0.50%                            |  | 9.45%                        | 27.11%                | 62.44%                      |
| Facility                                            | 0.49%                            | 0.25%                     | 0.98%                            |  | 14.74%                       | 27.27%                | 56.27%                      |
| Recommendation                                      | 0.49%                            | 0.00%                     | 0.74%                            |  | 9.34%                        | 19.16%                | 70.27%                      |
| Vaccine                                             | 0.00%                            | 0.76%                     | 0.00%                            |  | 17.05%                       | 29.01%                | 53.18%                      |
| Scheduling                                          | 1.23%                            | 3.44%                     | 4.42%                            |  | 21.38%                       | 18.67%                | 50.86%                      |
| <b>Motivation</b>                                   |                                  |                           |                                  |  |                              |                       |                             |
| Own risk                                            | 0.51%                            | 2.06%                     | 4.11%                            |  | 20.05%                       | 23.65%                | 49.61%                      |
| Job increases own risk                              | 11.40%                           | 24.61%                    | 17.10%                           |  | 19.95%                       | 16.32%                | 10.62%                      |
| Others' risk                                        | 0.26%                            | 0.26%                     | 1.79%                            |  | 19.74%                       | 22.05%                | 55.90%                      |
| Job increases risk for others                       | 27.46%                           | 32.38%                    | 10.62%                           |  | 18.65%                       | 5.96%                 | 4.92%                       |
| Restrictions                                        | 0.00%                            | 1.03%                     | 1.54%                            |  | 21.79%                       | 23.08%                | 52.56%                      |
| Travel                                              | 1.28%                            | 1.28%                     | 3.85%                            |  | 22.05%                       | 22.56%                | 48.97%                      |
| Official recommendation                             | 1.55%                            | 2.33%                     | 5.70%                            |  | 37.05%                       | 33.42%                | 19.95%                      |
| Antibody test post                                  | 1.83%                            | 9.40%                     | 16.97%                           |  | 34.99%                       | 24.80%                | 12.01%                      |
| <b>Booster vaccination</b>                          |                                  |                           |                                  |  |                              |                       |                             |
| Yearly booster                                      | 1.03%                            | 2.84%                     | 8.27%                            |  | 29.97%                       | 29.46%                | 28.42%                      |
| Booster in pharmacy                                 | 0.00%                            | 0.52%                     | 3.36%                            |  | 29.20%                       | 17.83%                | 49.10%                      |
